# Supplementary material
Source: PubMed Central journal article supplement (PMC3931551)

**Scapula**

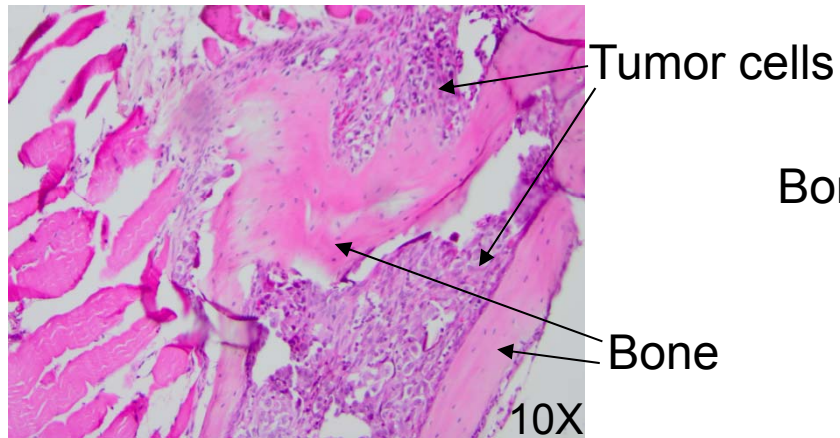

**Femur**

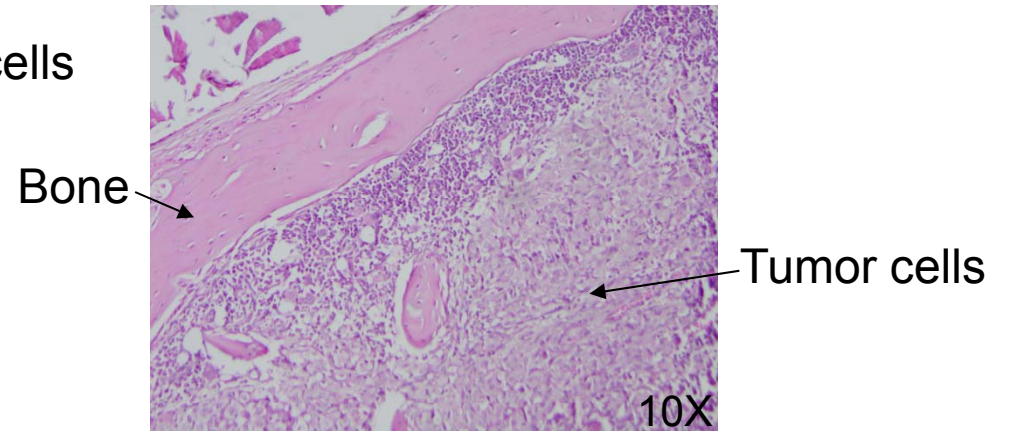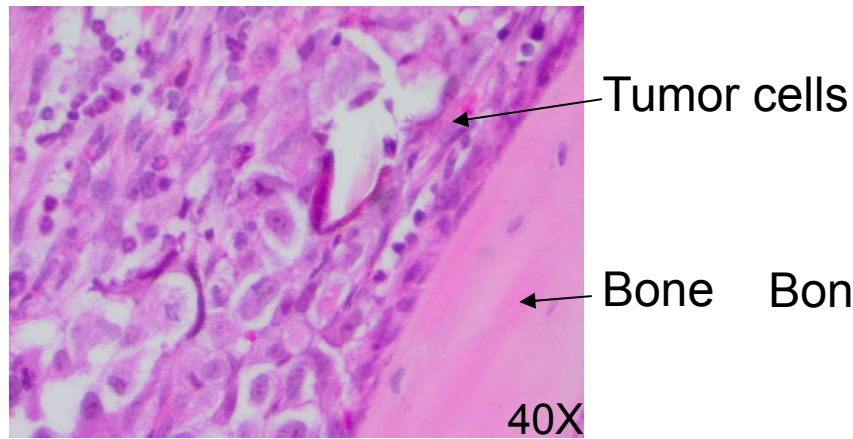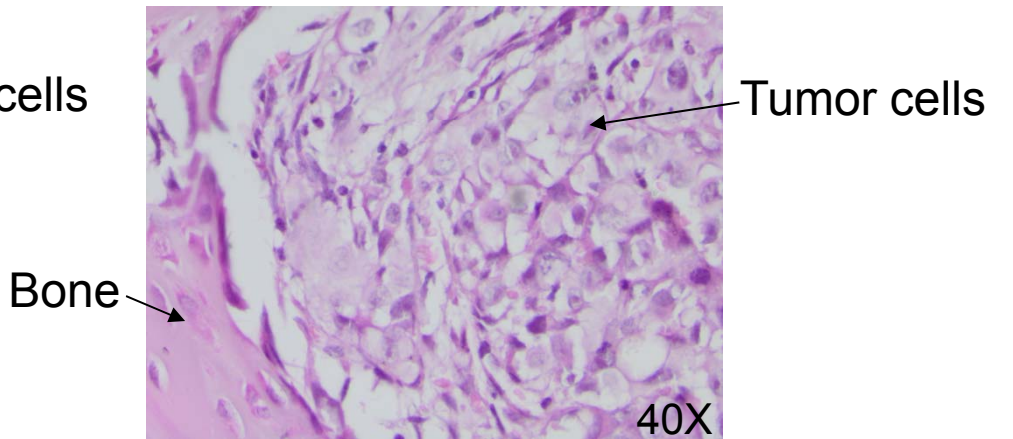

Supplement: NIHMS534830-supplement-Fig_S1.pdf [file NIHMS534830-supplement-Fig_S1.pdf]

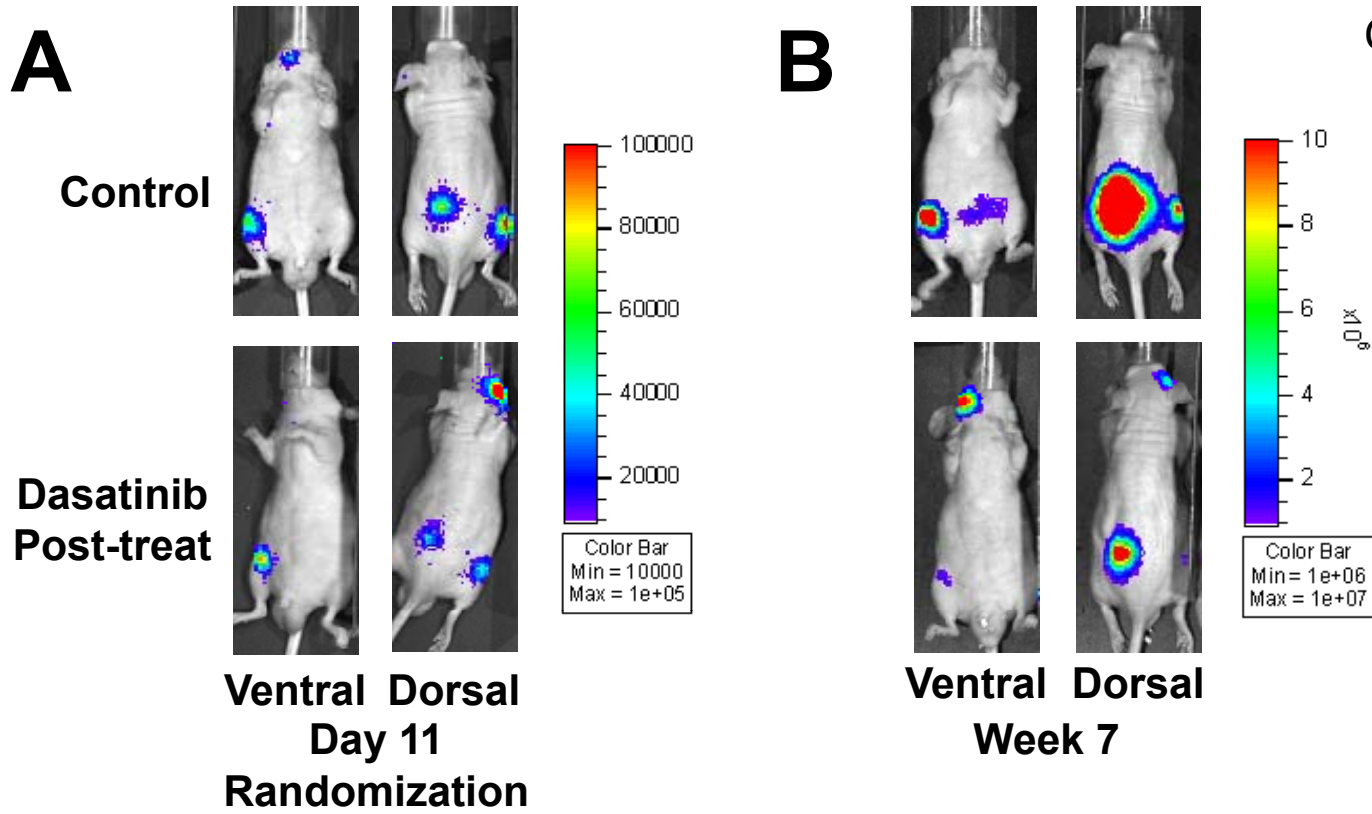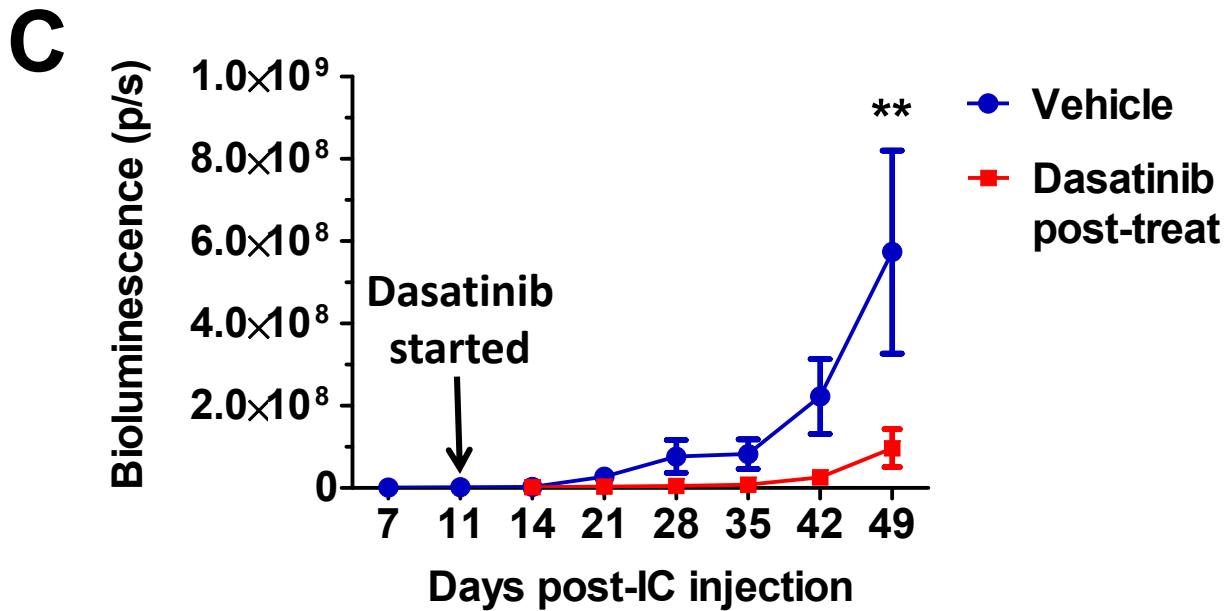

Supplement: NIHMS534830-supplement-Fig_S2.pdf [file NIHMS534830-supplement-Fig_S2.pdf]
